# Supplementary material for: Climate Change Adaptation and the Agriculture–Food System in Myanmar
Source: MDPI journal article supplement (doi:10.3390/cli11060124), 2023-06-06
Supplement: s1 [file s1]

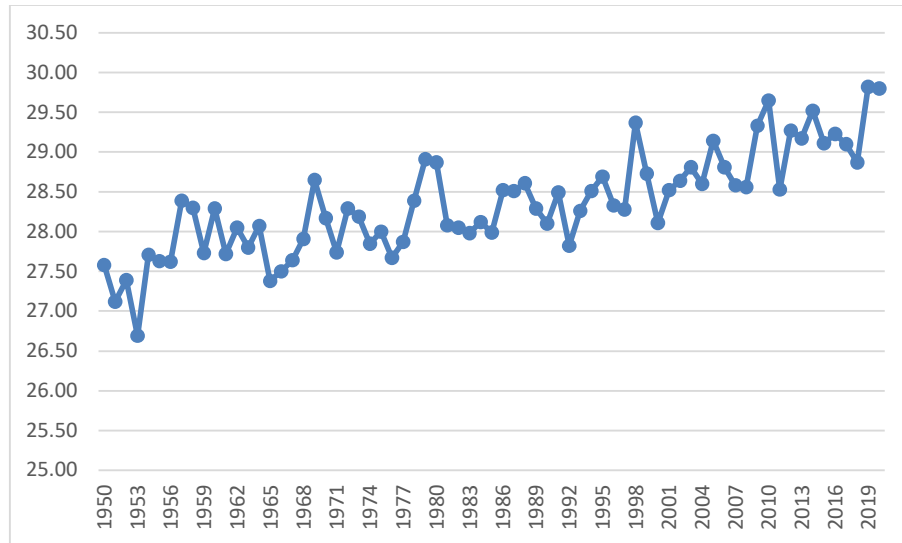

**Figure S1 Maximum Temperature Annual Trend of Myanmar (1950-2020)** ([Source: World Bank climate portal](#))

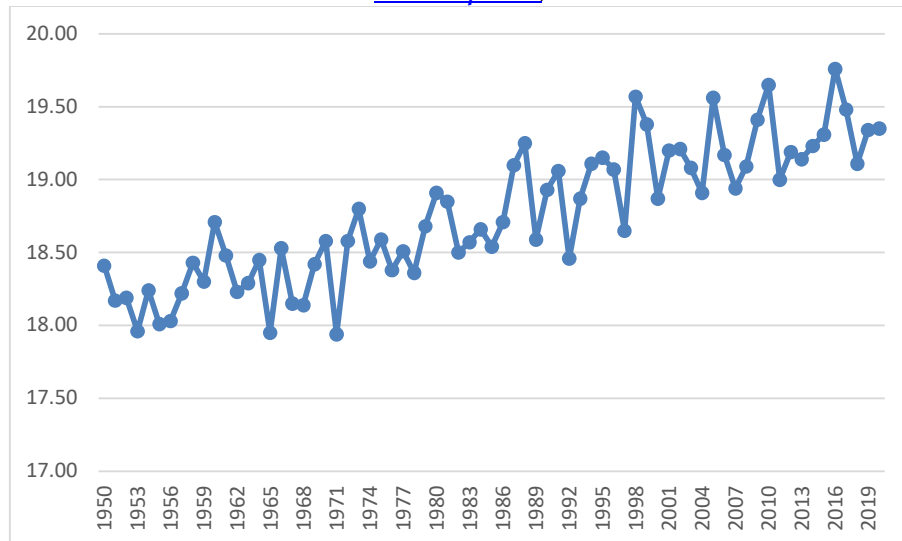

**Figure S2 Minimum Temperature Annual Trend of Myanmar (1950-2020)** ([Source: World Bank climate portal](#))

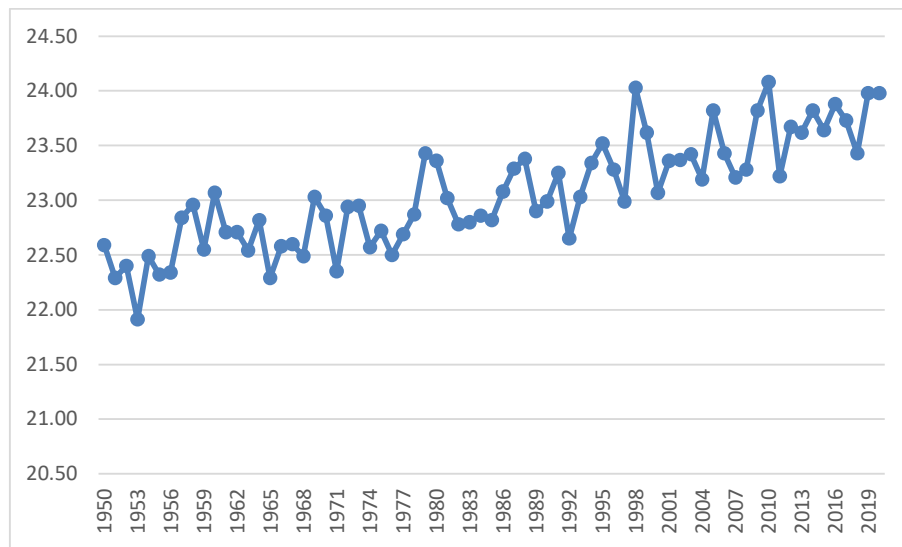

**Figure S3 Mean Temperature Annual Trend of Myanmar (1950-2020)** ([Source: World Bank climate portal](#))

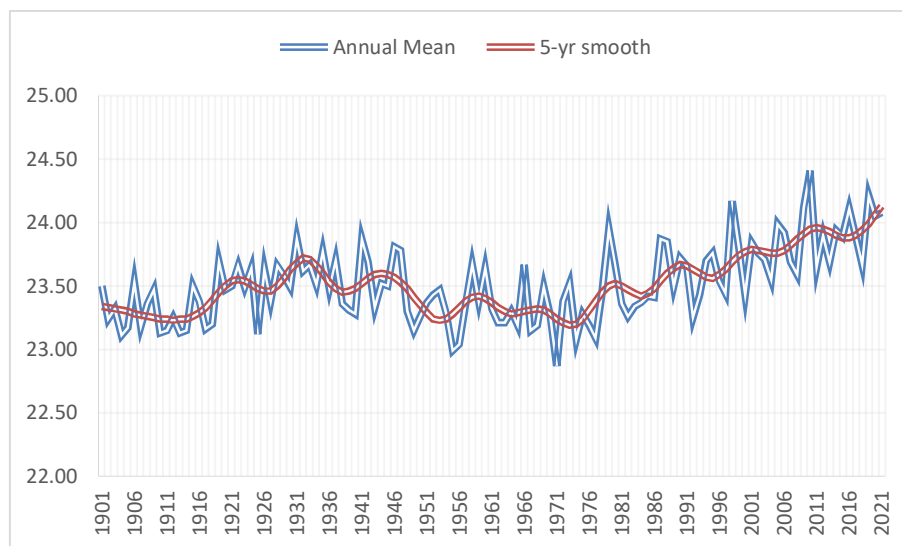

**Figure S4 Observed Average Annual Mean Trend of Myanmar (1901-2021)** ([Source: World Bank climate portal](#))

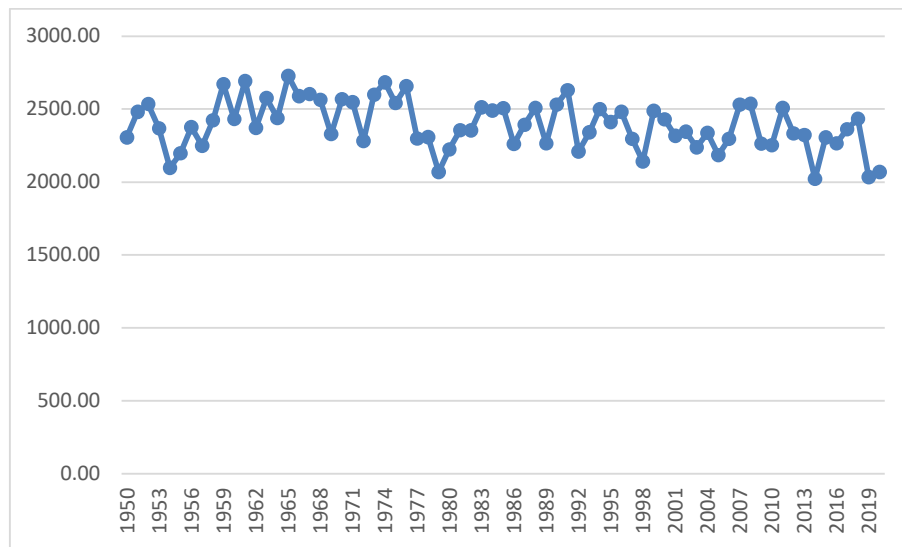

**Figure S5 Precipitation (mm) Annual Trend of Myanmar (1950-2020)** ([Source: World Bank climate portal](#))

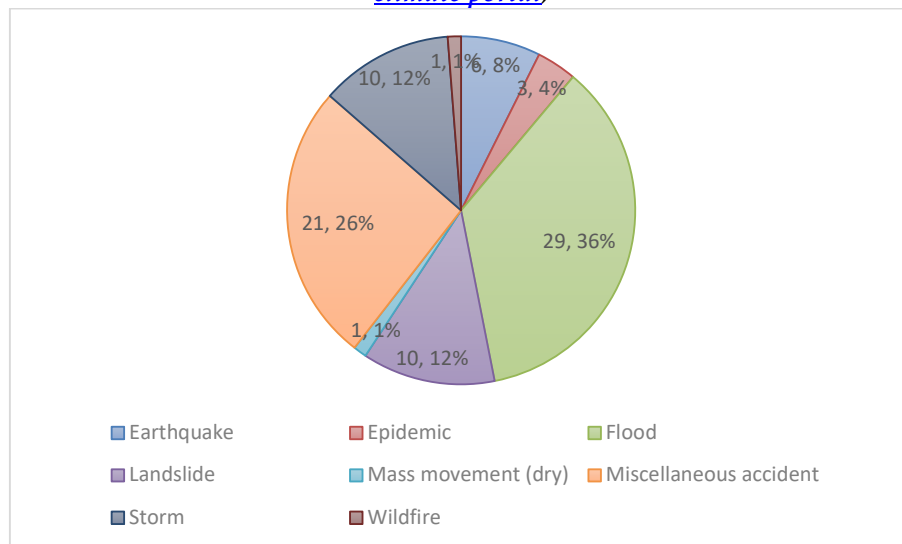

**Figure S6 Average Annual Natural Hazard Occurrence for Myanmar (1980-2020)** ([Source: World Bank climate portal](#))

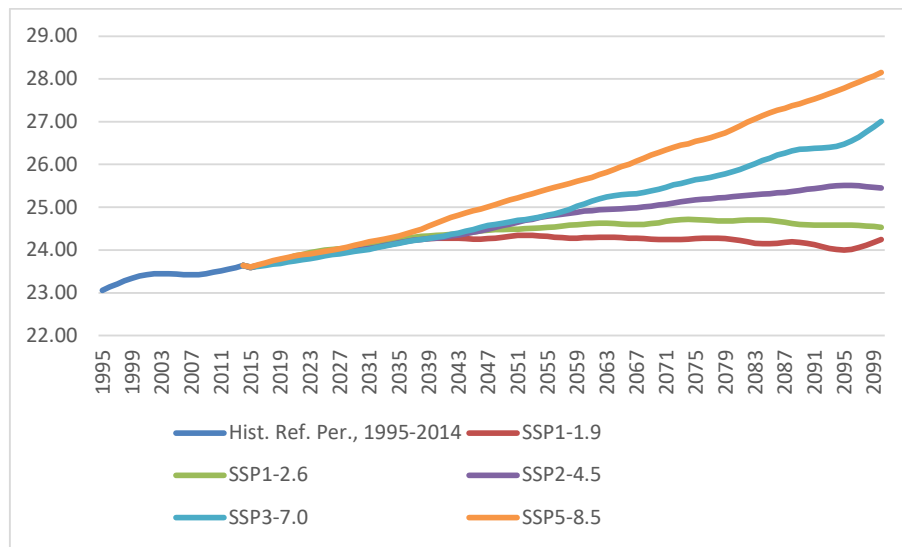

**Figure S7 Projected Mean-Temperature for Myanmar (Reference Period 1995-2014) Multi-model Ensemble 2020-2100) (Source: [World Bank climate portal](#))**

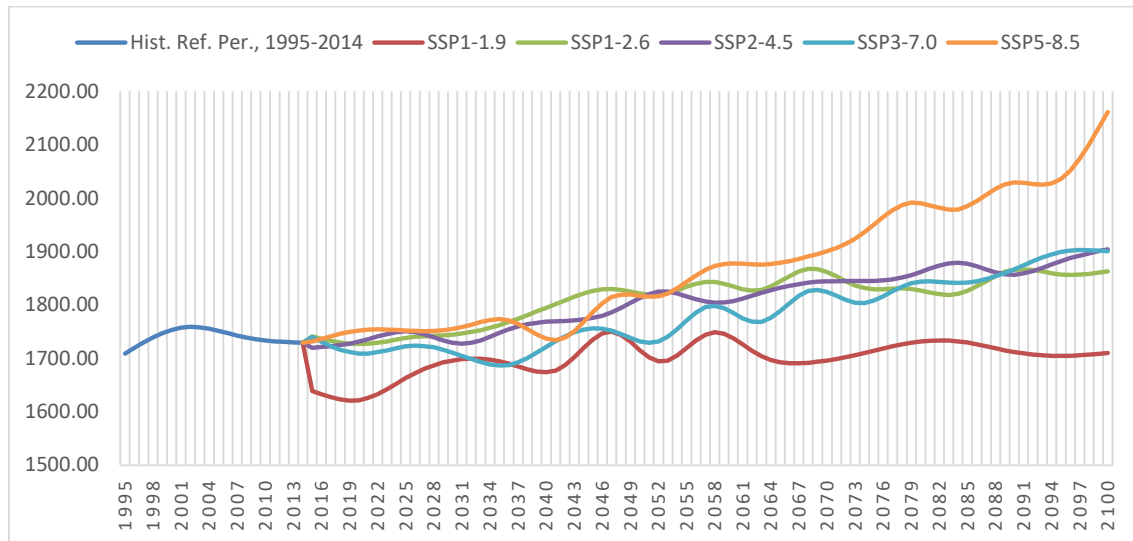

**Figure S8 Projected Mean-Precipitation for Myanmar (Reference Period 1995-2014) Multi-model Ensemble 2020-2100) (Source: [World Bank climate portal](#))**

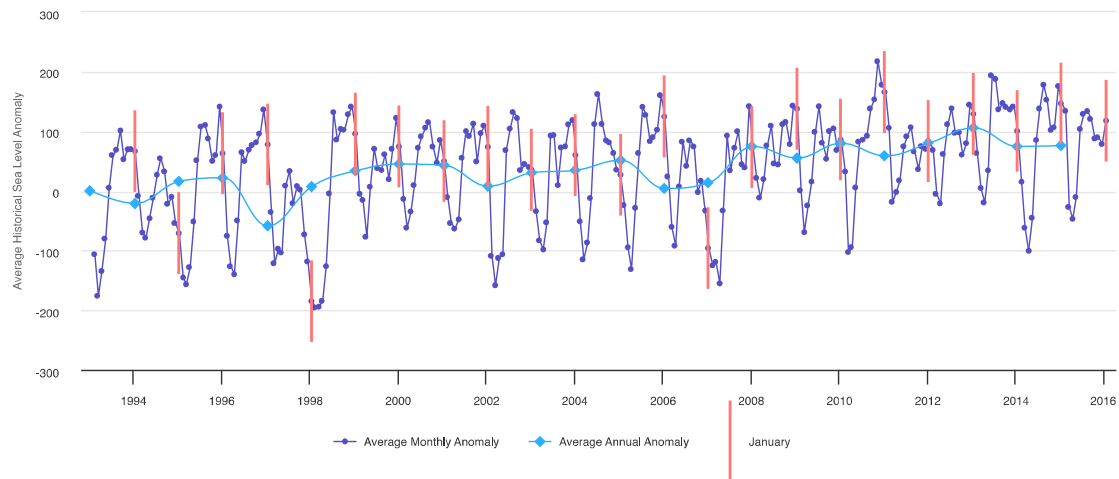

**Figure S9 Historical Sea-level for Coastal Myanmar (1993-2015) (Observed Anomalies relative to mean of 1993-2012)** ([Source: World Bank climate portal](#))

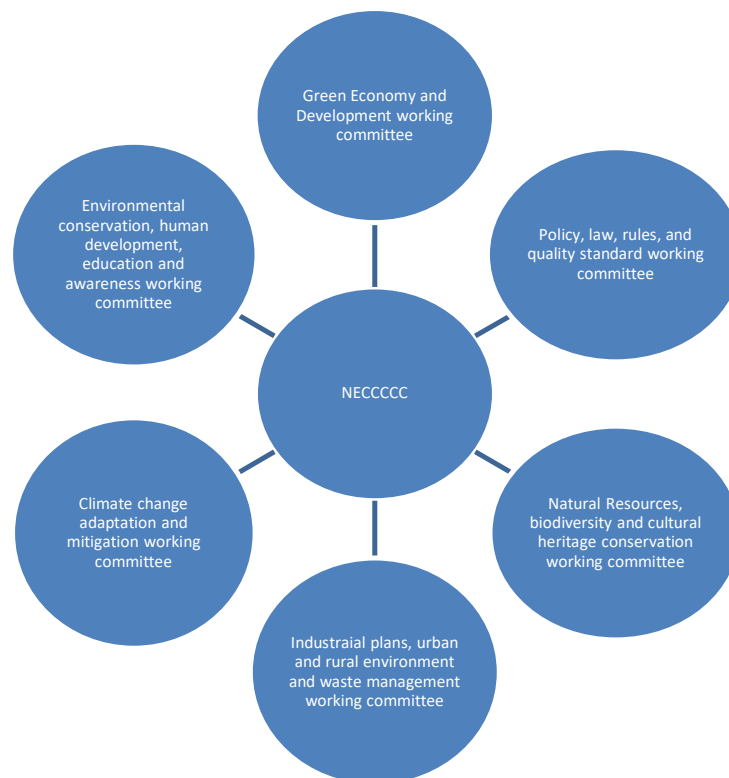

**Figure S10 . Working committees under the NECCCC** (source: MONREC 2021)

**Table S1. National-level climate change implementation  
institutions and their roles**

| Institution                                                                        | Roles and Responsibility                                                                                                                                                                                                                                                                                                                                                                       |
|------------------------------------------------------------------------------------|------------------------------------------------------------------------------------------------------------------------------------------------------------------------------------------------------------------------------------------------------------------------------------------------------------------------------------------------------------------------------------------------|
| National Environmental Conservation and Climate Change Central Committee (NECCCCC) | The NECCCCC serves as the focal point for various international environmental conventions and provides oversight on all environmental and climate change activities.                                                                                                                                                                                                                           |
| Ministry of Agriculture, Irrigation and Livestock (MOALI) <sup>1</sup>             | Under the NECCCC, MOALI is responsible for some climate-resilient technologies to reach the aims of food security policy.<br><br>Department of Agriculture (DOA), MOALI carries out projects related to traditional cultivation practices such as GAP, the System of Rice Intensification (SRI), resistant crop varieties, organic farming, and cropping patterns the climate change adaption. |
| MONREC- secretary                                                                  | MONREC plays the secretarial role for the NECCCCC and coordinates climate change-related activities, and reports on these activities to NECCCC.<br><br>It serves as the government focal point for the UNFCCC and its climate financing, the Green Climate Fund.                                                                                                                               |
| Global Stock-taking process by submitting its Biennial Update                      | A report in 2022 and Biennial Transparency Report (BTR) not later than 2024, as mandated by the Paris Agreement Rule Book.                                                                                                                                                                                                                                                                     |

---

<sup>1</sup> Hom et al. (2015)
