# Supplementary material for: Climate Change Adaptation and the Agriculture–Food System in Myanmar
Source: MDPI journal article supplement (doi:10.3390/cli11060124), 2023-06-06
Supplement: s1 [file s1]

Archive with 1 entries (1 files):
- climate-2319855-supplementary.pdf
